# Supplementary material
Source: PubMed Central journal article supplement (PMC3557086)
Supplement: 1213755110_pnas.201213755SI.pdf [file 1213755110_pnas.201213755SI.pdf]

# Supporting Information

Yu et al. 10.1073/pnas.1213755110

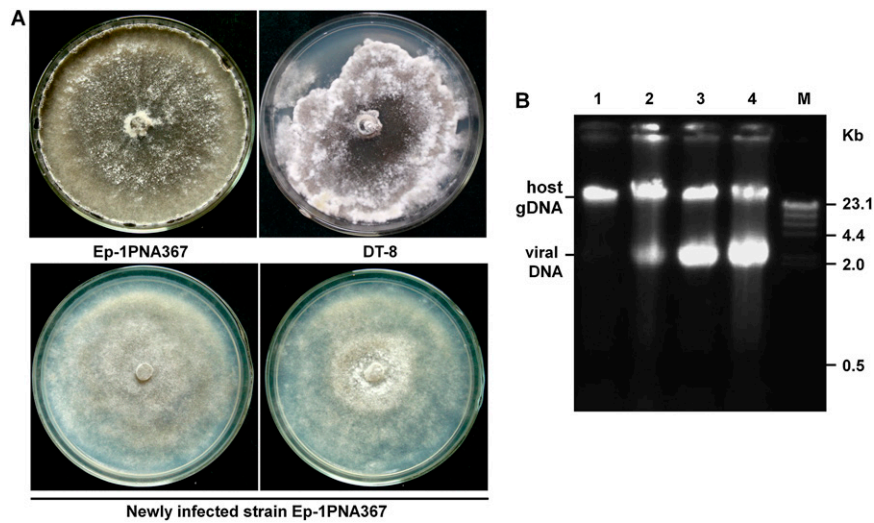

**Fig. S1.** Virus particles of SsHADV-1 infect the protoplasts of *Sclerotinia sclerotiorum* without being mediated by PEG. (A) Colony morphology of viral newly infected strain Ep-1PNA367. (B) Viral genome DNA extracted from newly infected strain Ep-1PNA367. Lane 1, strain Ep-1PNA367; lane 2, strain DT-8; lanes 3 and 4, newly infected strain Ep-1PNA367; lane M, weight marker. Protoplasts of *S. sclerotiorum* were directly mixed with virus particles.

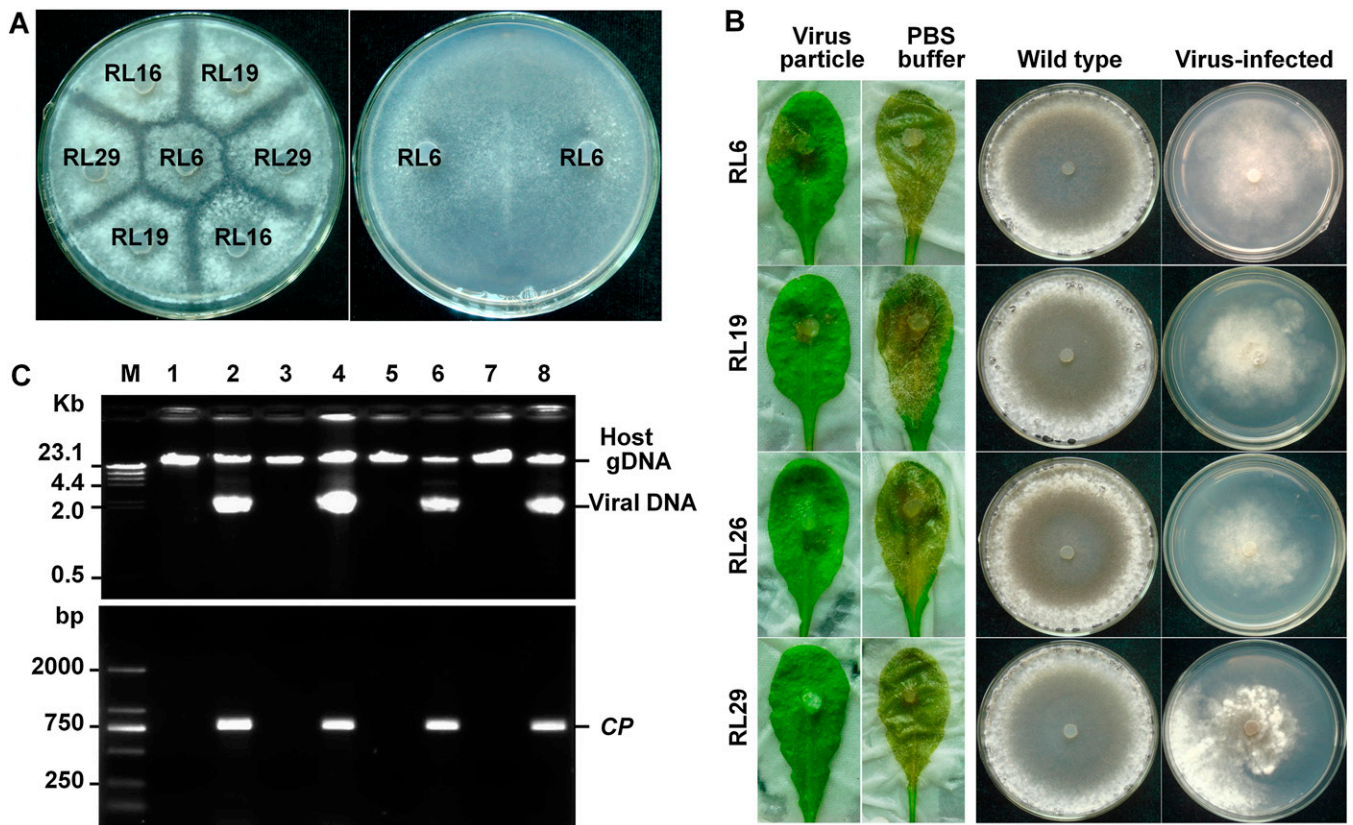

**Fig. S2.** Extracellular transmission of SsHADV-1 particles to *S. sclerotiorum* isolates belonging to different vegetative compatibility groups (VCGs). (A) Four isolates cultured on the same potato dextrose agar (PDA) plate containing red food coloring to show the incompatibility reaction zones. One randomly selected isolate (RL6) was dual-cultured in one PDA plate to show compatible reaction. (B) Suppression of *S. sclerotiorum* (strain Ep-1PNA367) lesion development on detached *Arabidopsis thaliana* leaves previously treated with virus particles and isolation of virus-infected colonies from such abnormal lesions. The wild-type strain and virus-infected isolates were incubated on PDA plates for 7 d at 20 °C. (C) The virus-infected cultures were confirmed both by total genomic DNA analysis and PCR amplification. PCR amplification was performed using specific primers, which were designed based on the CP sequence of SsHADV-1. DNA samples (Upper) and PCR products (Lower) were fractionated on 1.0% agarose gel. Lane M:  $\lambda$ -Hind III-digested DNA marker (Upper) and DL2000 DNA marker (Lower). Lanes 1 and 2; 3 and 4; 5 and 6; and 7 and 8 indicate the wild-type and virus-infected isolates of RL6, RL19, RL26, and RL29, respectively.

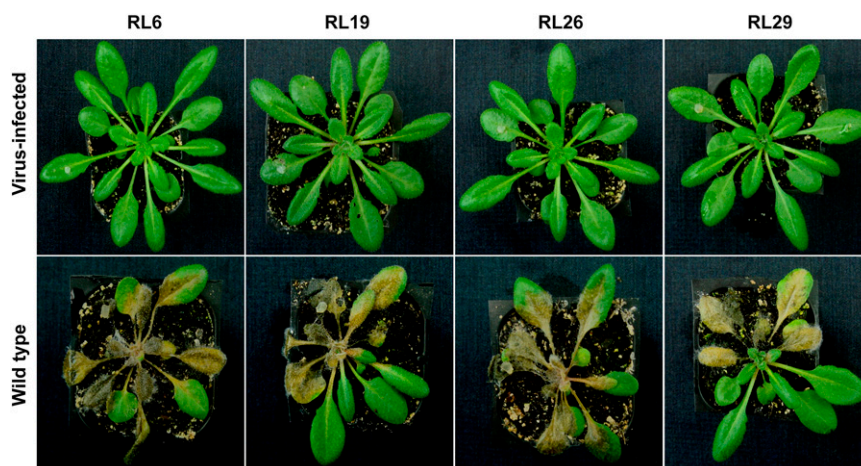

**Fig. S3.** Virulence of four *S. sclerotiorum* strains (RL6, RL19, RL26, and RL29) belonging to different vegetative compatibility groups on plants of *A. thaliana* before or after infection with SsHADV-1. Inoculated plants were incubated under high relative humidity (100%) at 20 °C for 4 d.

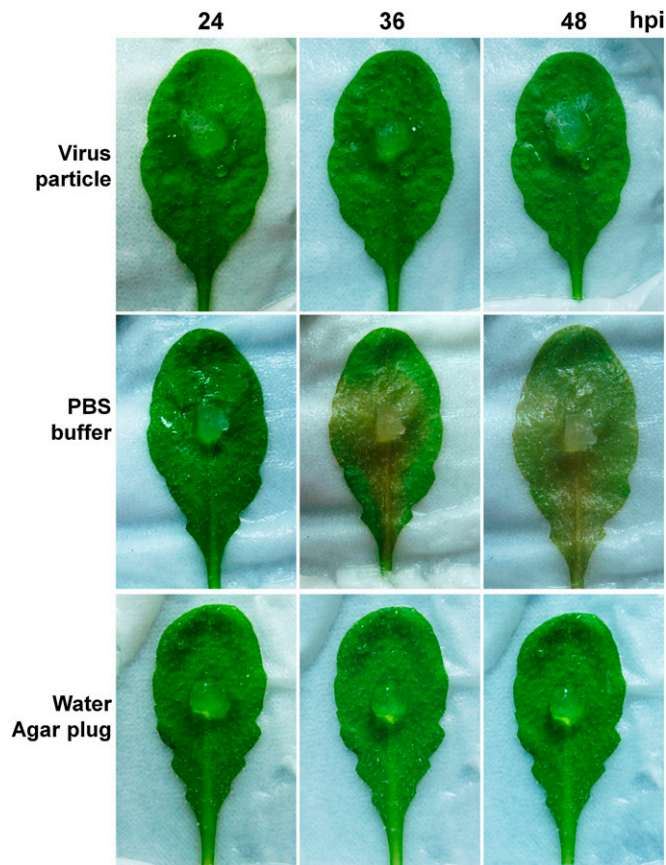

**Fig. S4.** Infection of *S. sclerotiorum* strain Ep-1PNA367 with purified particles of SsHADV-1 on detached leaves of *A. thaliana*. Lesion development on virus-treated leaves was delayed and the lesions were much smaller than those on PBS buffer-treated leaves. Agar plugs were used as control.

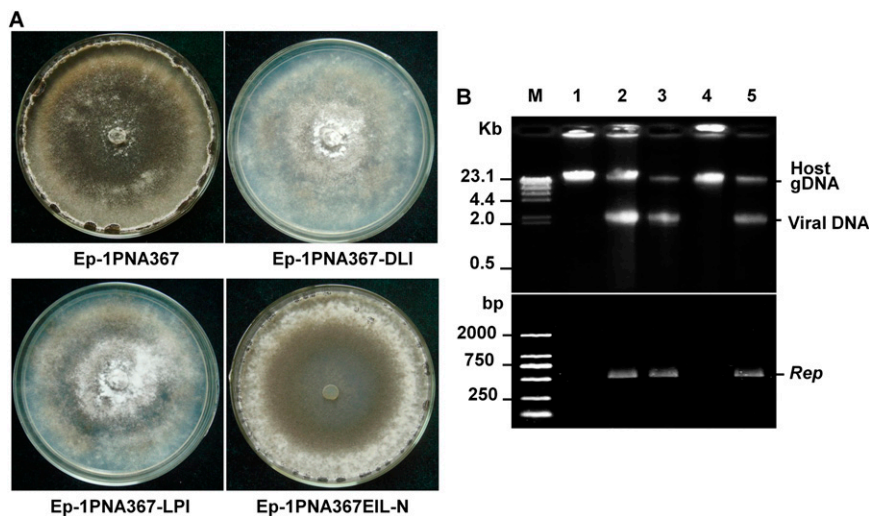

**Fig. S5.** SsHADV-1-infected *S. sclerotiorum* strains isolated from virus-treated lesions. (A) Colony morphology of cultures that were reisolated from atypical lesions caused by strain Ep-1PNA367 on virus-inoculated leaves. Cultures isolated from atypical lesions on detached leaves or intact plants were designated Ep-1PNA367-DLI and Ep-1PNA367LPI, respectively; typical lesions on nontreated leaves were designated Ep-1PNA367EIL-N. The virus-free strain Ep-1PNA367 was used as control. All cultures were incubated on PDA plates for 7 d at 20 °C. (B) Total DNA samples extracted from cultures, and PCR amplification to verify infection of strain Ep-1PNA367 by SsHADV-1. A specific primer pair used for PCR amplification was designed based on the Rep sequence. DNA samples (*Upper*) and PCR products (*Lower*) were analyzed on 1.0% agarose gel. Line M:  $\lambda$ -Hind III-digested DNA marker (*Upper*) and DL2000 DNA marker (*Lower*). Lanes 1–5, DNA samples from isolates Ep-1PNA367, Ep-1PNA367-DLI, Ep-1PNA367-LPI, Ep-1PNA367EIL-N, and DT-8. The positions of host genomic DNA and viral DNA are indicated.

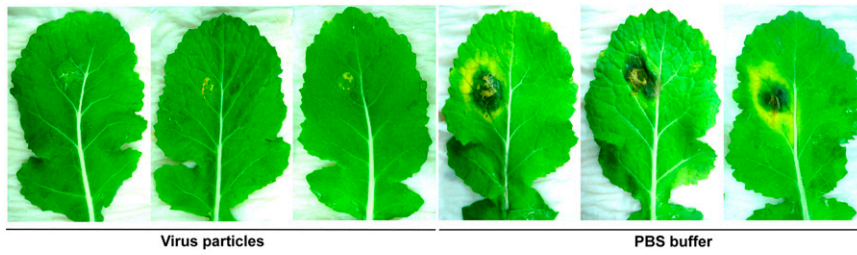

**Fig. 56.** SsHADV-1 particles inhibited infection of rapeseed (*Brassica napus*) leaves with *S. sclerotiorum* via contact with infected petals. Ten microliters of viral particles (2 mg/mL) or 0.01 M phosphate buffer (pH 7.0) were added as droplets on leaf surface, and then petals were placed on droplets of viral suspension or PBS buffer. Twenty microliters of ascospores suspension of *S. sclerotiorum* ( $1 \times 10^6$  ascospores/mL) was inoculated onto the upper side of petals. Leaves were kept in an incubator with high humidity (100%) at 20 °C for 4 d.
